# Supplementary material for: High-temperature inverted annealing for efficient perovskite photovoltaics
Source: Royal Society of Chemistry journal article supplement (doi:10.1039/d1ce00914a), 2021-01-01
Supplement: d1ce00914a1.pdf [file d1ce00914a1.pdf]

## Supplementary Materials for

### **High-temperature inverted annealing for efficient perovskite photovoltaics**

Fang Wen,<sup>a,†</sup> Liuwen Tian,<sup>a,†</sup> Wenfeng Zhang,<sup>a,\*</sup> Xiangqing Zhou,<sup>a</sup> Puan Lin,<sup>a</sup> Shenghou Zhou,<sup>a</sup> Lin Du,<sup>a</sup> Tian Hou,<sup>a</sup> Wenjing Yu,<sup>a</sup> Lang Yu,<sup>a</sup> Gongtao Duan,<sup>a</sup> Changtao Peng,<sup>a</sup> Zhu Ma,<sup>a</sup> Meng Zhang,<sup>a</sup> Haijin Li,<sup>a</sup> and Yuelong Huang<sup>a</sup>

a. Institute of Photovoltaic, Southwest Petroleum University, Chengdu 610500, China

†. Fang Wen and Liuwen Tian contributed equally to this work.

Corresponding Authors: \*E-mail: wfzhang@mail.ustc.edu.cn

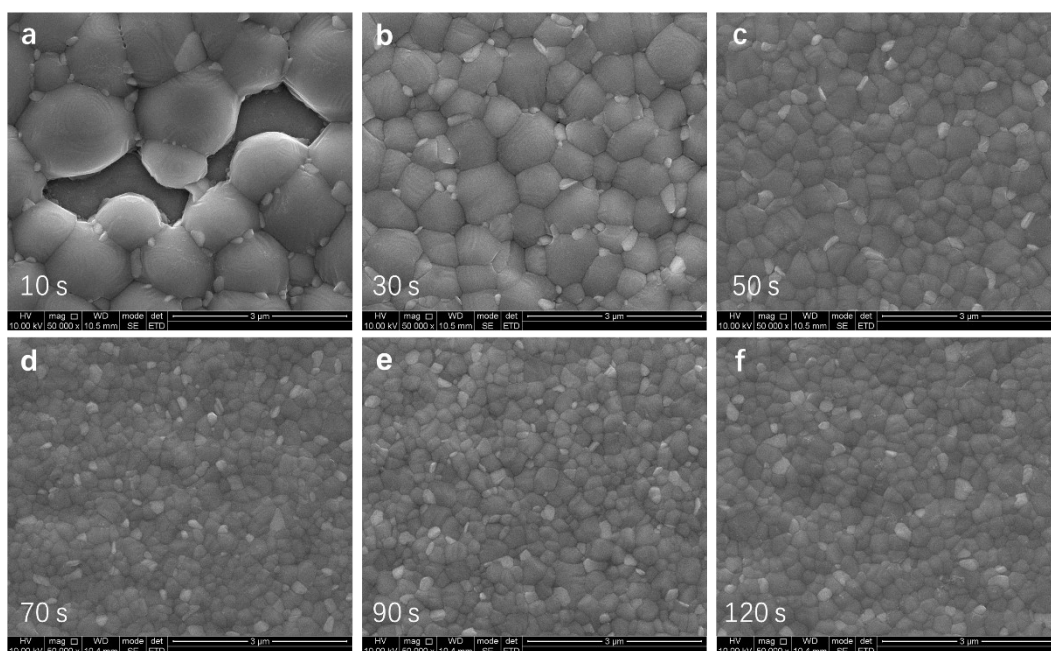

**Fig. S1.** Top-view SEM images of the CsFAMA hybrid perovskite films with respect to pre-annealing time at 60°C. (a) 10 s, (b) 30 s, (c) 50 s, (d) 70 s, (e) 90 s, (f) 120 s.

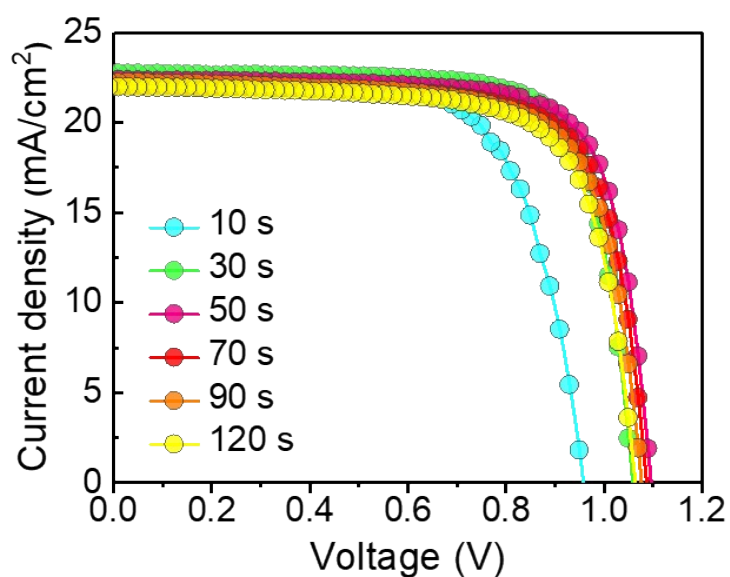

**Fig. S2.** Representative  $J$ - $V$  curves of cells based on CsFAMA films with different pre-annealing time. Note that these  $J$ - $V$  curves were recorded under reverse scan direction with a scan rate of 0.1 V/s.

**Table S1.** Summary of photovoltaic metrics data of each kind of cell derived from the  $J$ - $V$  curves in Figure S2.

| conditions | $V_{OC}$ (V) | $J_{SC}$ (mA/cm <sup>2</sup> ) | FF (%) | PCE (%) |
|------------|--------------|--------------------------------|--------|---------|
| 10 s       | 0.958        | 22.89                          | 69.2   | 15.11   |
| 30 s       | 1.058        | 23.12                          | 76.5   | 18.71   |
| 50 s       | 1.096        | 22.74                          | 76.3   | 19.02   |
| 70 s       | 1.087        | 22.46                          | 74.4   | 18.17   |
| 90 s       | 1.071        | 22.34                          | 73.7   | 17.63   |
| 120 s      | 1.064        | 22.36                          | 73.0   | 17.37   |

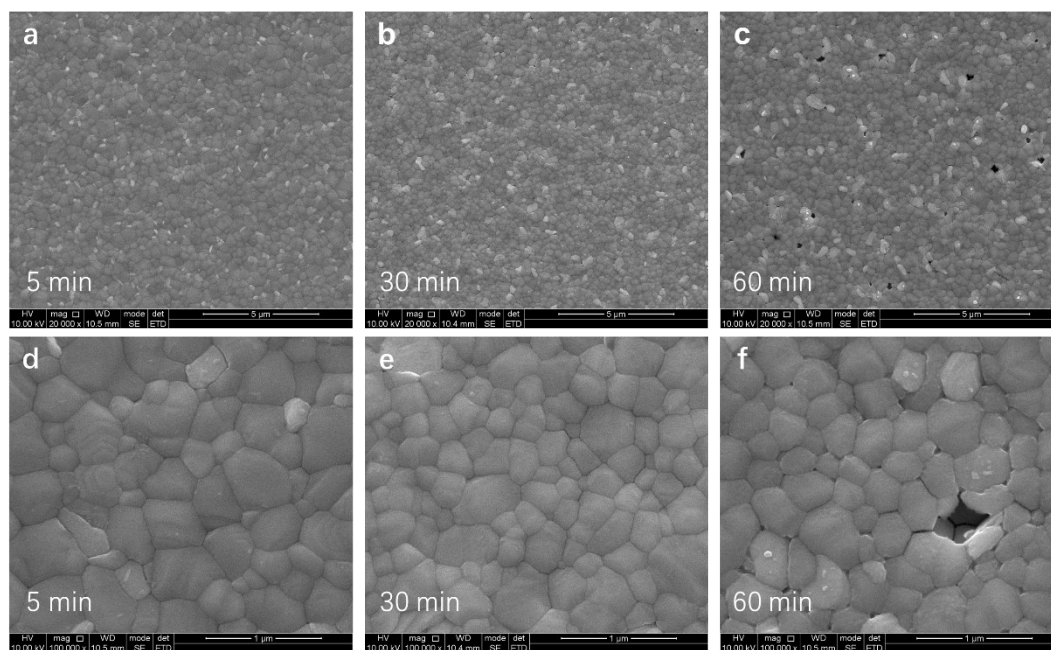

**Fig. S3.** Top-view SEM images of the CsFAMA triple-cation perovskite films treated by inverted annealing at 150°C for different periods of time. (a, d) 5 min, (b, e) 30 min, (c, f) 60 min.

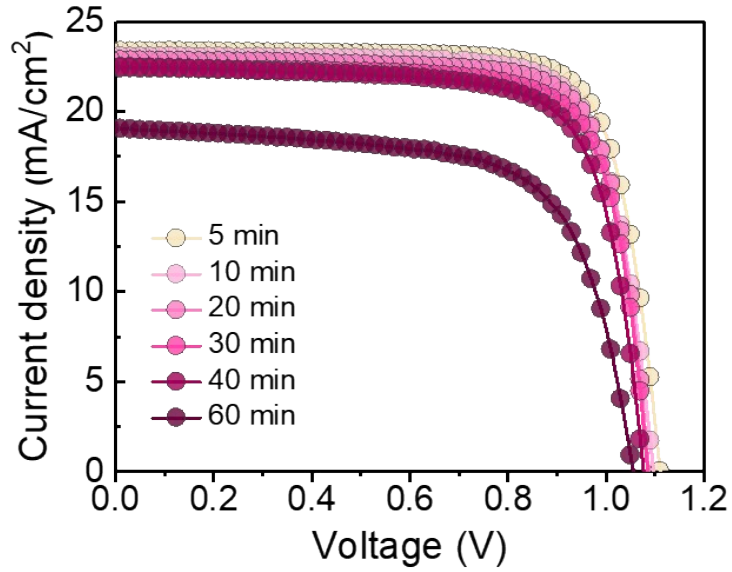

**Fig. S4.** Representative  $J$ - $V$  curves of cells based on CsFAMA perovskite films treated by inverted annealing at 150°C for different periods of time. Note that these  $J$ - $V$  curves were measured under reverse scan direction with a sweep rate of 0.1 V/s.

**Table S2.** Summary of photovoltaic metrics data of each kind of device derived from the  $J$ - $V$  curves in Figure S4.

| conditions | $V_{OC}$ (V) | $J_{SC}$ (mA/cm <sup>2</sup> ) | FF (%) | PCE (%) |
|------------|--------------|--------------------------------|--------|---------|
| 5 min      | 1.110        | 23.37                          | 77.7   | 20.16   |
| 10 min     | 1.097        | 23.06                          | 77.0   | 19.48   |
| 20 min     | 1.087        | 22.85                          | 77.4   | 19.22   |
| 30 min     | 1.085        | 22.40                          | 76.3   | 18.55   |
| 40 min     | 1.076        | 22.06                          | 74.1   | 17.59   |
| 60 min     | 1.063        | 18.69                          | 67.7   | 13.45   |

**Table S3.** Summary of Full-Width-Half-Maximum (FWHM) and diffraction intensity of the main XRD

peaks for the CsFAMA perovskite films based on the XRD data shown in **Figure 3d**.

| conditions | diffraction peak          | FWHM (degree) | intensity (counts) |
|------------|---------------------------|---------------|--------------------|
| inverted   | (001)                     | 0.136         | 3072               |
|            | (002)                     | 0.102         | 2248               |
|            | (012)                     | 0.097         | 2160               |
|            | (001) of PbI <sub>2</sub> | /             | 444                |
| normal     | (001)                     | 0.130         | 2789               |
|            | (002)                     | 0.106         | 1944               |
|            | (012)                     | 0.097         | 2109               |
|            | (001) of PbI <sub>2</sub> | /             | 565                |

**Table S4.** Fitting results of the TRPL decay curves for CsFAMA perovskite films prepared on glass substrates.

| conditions for CsFAMA films | $\tau_1$ (ns) | Fraction 1 | $\tau_2$ (ns) | Fraction 2 | $\tau_{ave}$ (ns) |
|-----------------------------|---------------|------------|---------------|------------|-------------------|
| Normal annealing            | 4.9           | 4.1%       | 173.1         | 95.9%      | 172.9             |
| Inverted annealing          | 4.2           | 2.6%       | 235.1         | 97.4%      | 235.0             |

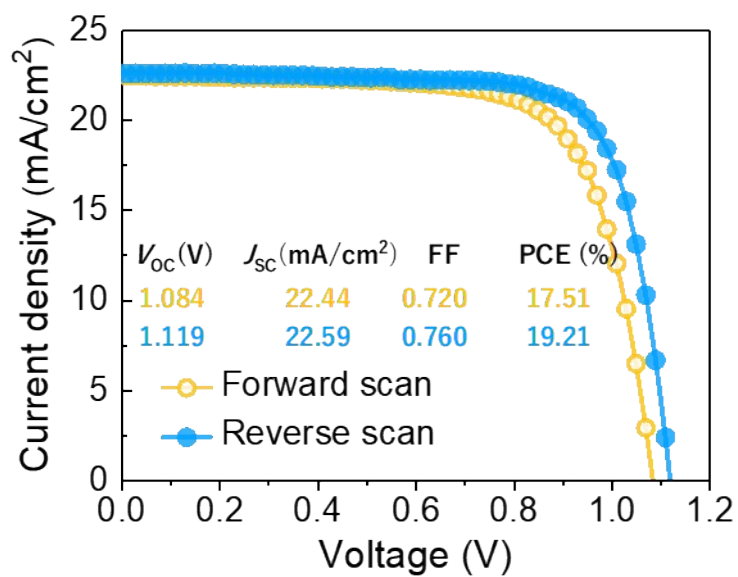

**Fig. S5.** J-V curves of the best-performing cell based on a normal annealed CsFAMA perovskite film measured from reverse and forward scan with a sweep rate of 0.1 V/s.

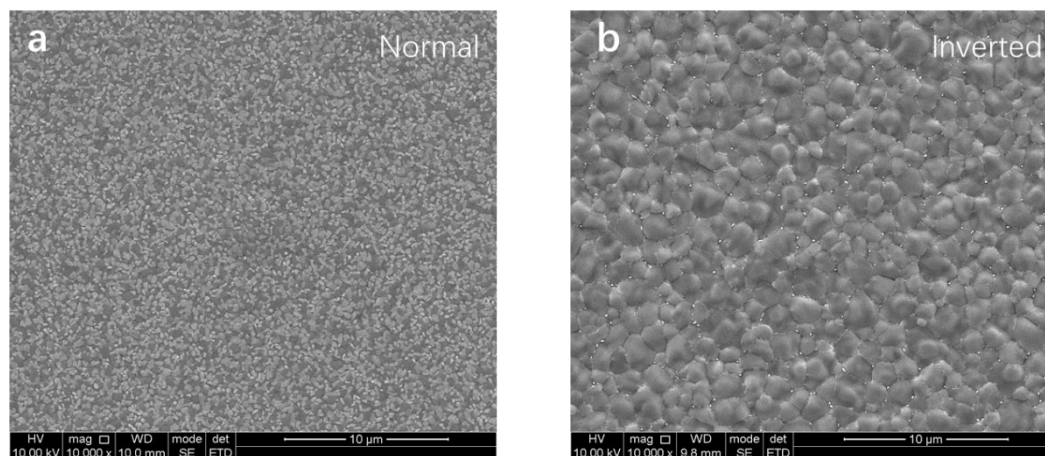

**Fig. S6.** Surface-view SEM images of MAPbI<sub>3</sub> perovskite films treated by normal annealing (a) or inverted annealing (b) at 150°C for 5 min.

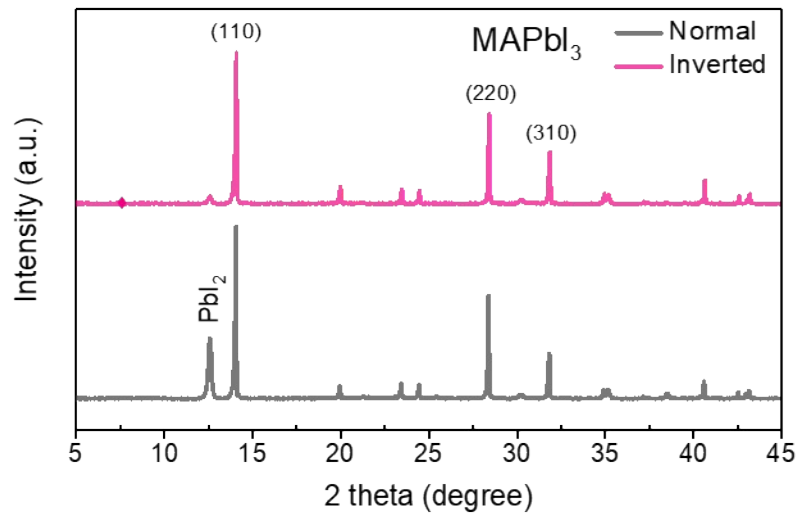

**Fig. S7.** XRD patterns of normal annealed and inverted annealed MAPbI<sub>3</sub> perovskite films.

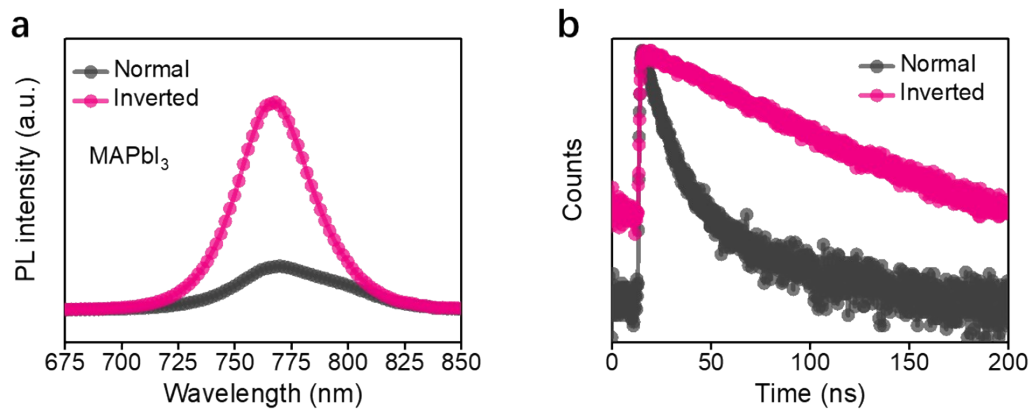

**Fig. S8.** Steady-state PL spectra (a) and TRPL decay curves (b) of the two types of MAPbI<sub>3</sub> perovskite films deposited on glass substrates.

**Table S5.** Fitting results of the TRPL decay curves for MAPbI<sub>3</sub> films prepared on glass substrates.

| conditions for MAPbI <sub>3</sub> films | $\tau_1$ (ns) | Fraction 1 | $\tau_2$ (ns) | Fraction 2 | $\tau_{ave}$ (ns) |
|-----------------------------------------|---------------|------------|---------------|------------|-------------------|
| Normal annealing                        | 8.3           | 59.0%      | 46.9          | 41.0%      | 39.1              |
| Inverted annealing                      | 14.0          | 9.6%       | 70.6          | 90.4%      | 69.4              |

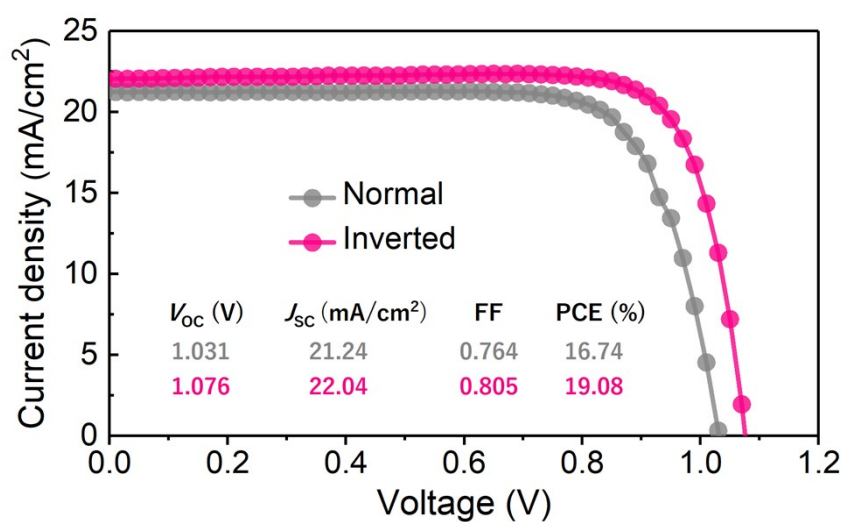**Fig. S9.**  $J$ - $V$  curves of the best-performing photovoltaic device based on the normal annealed or inverted annealed MAPbI<sub>3</sub> perovskite films. Note that the  $J$ - $V$  curves were recorded under reverse scan with a scan rate of 0.1 V/s.



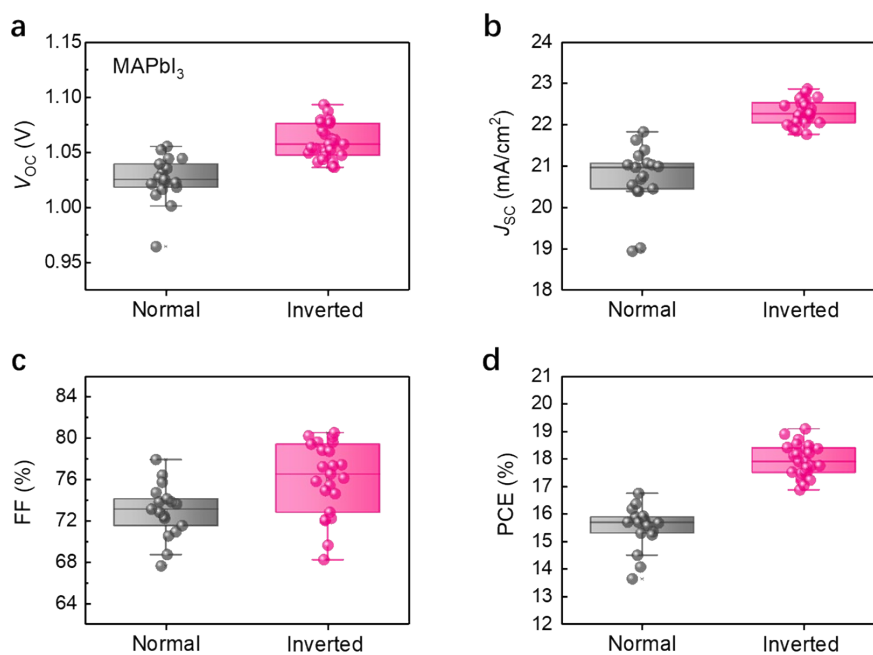

**Fig. S10.** Statistical distributions of photovoltaic metrics collected from around 20 independent cells of the two types of MAPbI<sub>3</sub> photovoltaic devices. (a)  $V_{OC}$ , (b)  $J_{SC}$ , (c) FF, (d) PCE.

**Table S6.** Summary of the photovoltaic metrics collected from around 20 independent cells of the two types of MAPbI<sub>3</sub> perovskite photovoltaic devices.

| devices  | $V_{OC}$ (V) | $J_{SC}$ (mA/cm <sup>2</sup> ) | FF (%)   | PCE (%)    |
|----------|--------------|--------------------------------|----------|------------|
| Normal   | 1.025±0.021  | 20.72±0.75                     | 72.9±2.5 | 15.48±0.77 |
| Inverted | 1.060±0.016  | 22.30±0.30                     | 76.0±3.4 | 17.93±0.58 |
